# Supplementary material for: Inflammatory Biomarkers of Traumatic Brain Injury
Source: MDPI journal article supplement (doi:10.3390/ph15060660), 2022-05-25
Supplement: s1 [file s1]

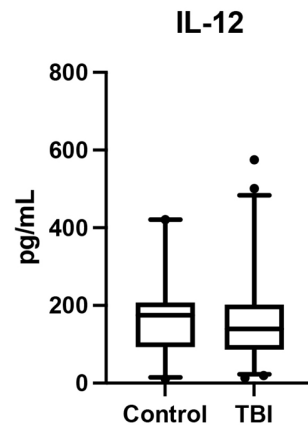

**Figure S1:** IL-12 profile in serum. MSD-VPLEX Inflammatory Panel of blood serum from TBI patients and age matched controls. Box and whisker plots show mean and quartiles. Dots correspond to data points outside the 5<sup>th</sup> and 95<sup>th</sup> percent confidence interval. N: Control: 21, TBI: 45.

A

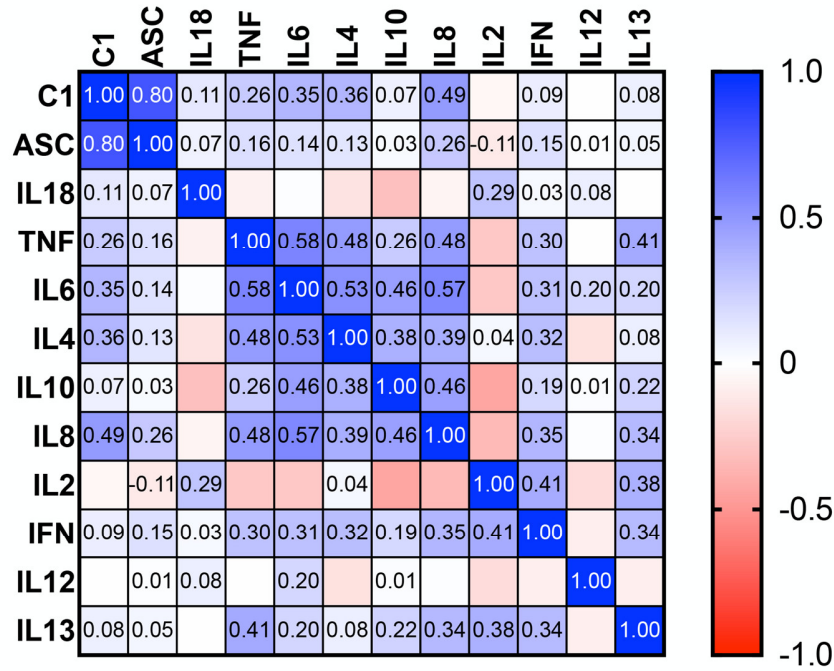

B

|      | C1         | ASC        | IL18       | TNF        | IL6        | IL4        | IL10       | IL8        | IL2        | IFN        | IL12       | IL13       |
|------|------------|------------|------------|------------|------------|------------|------------|------------|------------|------------|------------|------------|
| C1   |            | 3.5622E-18 | 0.32982871 | 0.0998328  | 0.03612023 | 0.02237335 | 0.68528936 | 0.00111715 | 0.86286364 | 0.59338027 | 0.97444652 | 0.63253127 |
| ASC  | 3.5622E-18 |            | 0.51551282 | 0.26245559 | 0.36109853 | 0.38158001 | 0.87336045 | 0.06172133 | 0.65663176 | 0.30799447 | 0.97379687 | 0.74003808 |
| IL18 | 0.32982871 | 0.51551282 |            | 0.60557679 | 0.99339096 | 0.31374174 | 0.05240022 | 0.64516625 | 0.24052364 | 0.81680661 | 0.60140303 | 0.93715334 |
| TNF  | 0.0998328  | 0.26245559 | 0.60557679 |            | 3.3821E-05 | 0.0007089  | 0.12418387 | 0.00053454 | 0.31209903 | 0.04148679 | 0.97182768 | 0.00354021 |
| IL6  | 0.03612023 | 0.36109853 | 0.99339096 | 3.3821E-05 |            | 0.00014695 | 0.00512444 | 3.484E-05  | 0.281497   | 0.04816858 | 0.23774145 | 0.19809887 |
| IL4  | 0.02237335 | 0.38158001 | 0.31374174 | 0.0007089  | 0.00014695 |            | 0.0188068  | 0.00550784 | 0.88686426 | 0.03296423 | 0.34999492 | 0.57102429 |
| IL10 | 0.68528936 | 0.87336045 | 0.05240022 | 0.12418387 | 0.00512444 | 0.0188068  |            | 0.00322949 | 0.10725454 | 0.27311673 | 0.94522064 | 0.18451955 |
| IL8  | 0.00111715 | 0.06172133 | 0.64516625 | 0.00053454 | 3.484E-05  | 0.00550784 | 0.00322949 |            | 0.17295088 | 0.01650078 | 0.97991616 | 0.01724811 |
| IL2  | 0.86286364 | 0.65663176 | 0.24052364 | 0.31209903 | 0.281497   | 0.88686426 | 0.10725454 | 0.17295088 |            | 0.13382645 | 0.53791612 | 0.13266718 |
| IFN  | 0.59338027 | 0.30799447 | 0.81680661 | 0.04148679 | 0.04816858 | 0.03296423 | 0.27311673 | 0.01650078 | 0.13382645 |            | 0.60541039 | 0.02571528 |
| IL12 | 0.97444652 | 0.97379687 | 0.60140303 | 0.97182768 | 0.23774145 | 0.34999492 | 0.94522064 | 0.97991616 | 0.53791612 | 0.60541039 |            | 0.59214281 |
| IL13 | 0.63253127 | 0.74003808 | 0.93715334 | 0.00354021 | 0.19809887 | 0.57102429 | 0.18451955 | 0.01724811 | 0.13266718 | 0.02571528 | 0.59214281 |            |

Figure S2: A) Autocorrelation Plot of all analytes examined in this study; B) p-values for the respective comparisons shown in the autocorrelation plot.

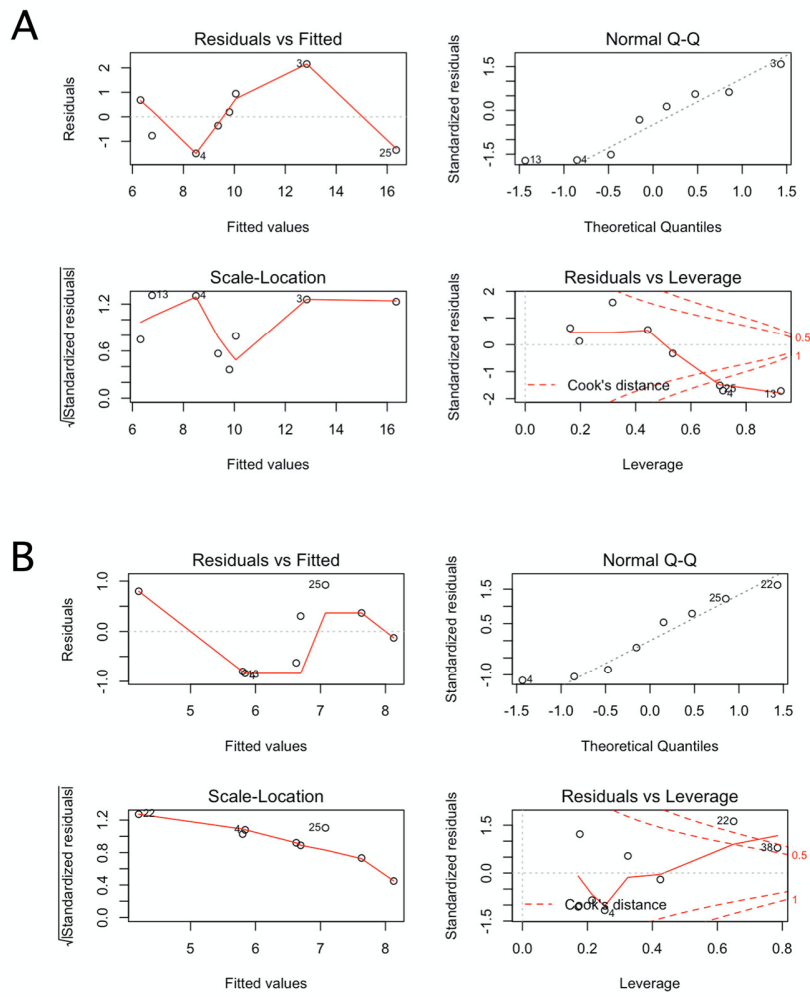

**Figure S3: Residual Analysis.** Residual analysis of the multivariate linear regression models used to explain GCS (**A**) and GOS-E (**B**) were performed to determine the goodness of fit of each of the models.
